# Supplementary material for: Design of a highly ordered mesoporous H3PW12O40/ZrO2–Si(Ph)Si hybrid catalyst for methyl levulinate synthesis
Source: Royal Society of Chemistry journal article supplement (doi:10.1039/c3gc36912a), 2013-01-01

## **Support Information for**

**“Design of highly ordered mesoporous  $\text{H}_3\text{PW}_{12}\text{O}_{40}/\text{ZrO}_2\text{-Si(Ph)Si}$   
hybrid catalyst for methyl levulinate synthesis”**

**Fig. S1** (a) wide-angle XRD patterns of  $\text{H}_3\text{PW}_{12}\text{O}_{40}/\text{ZrO}_2\text{-Si(Ph)Si}$  and pure  $\text{H}_3\text{PW}_{12}\text{O}_{40}$ , and (b) Low-angle XRD patterns of  $\text{H}_3\text{PW}_{12}\text{O}_{40}/\text{ZrO}_2\text{-Si(Ph)Si}$  and  $\text{H}_3\text{PW}_{12}\text{O}_{40}/\text{ZrO}_2$ .

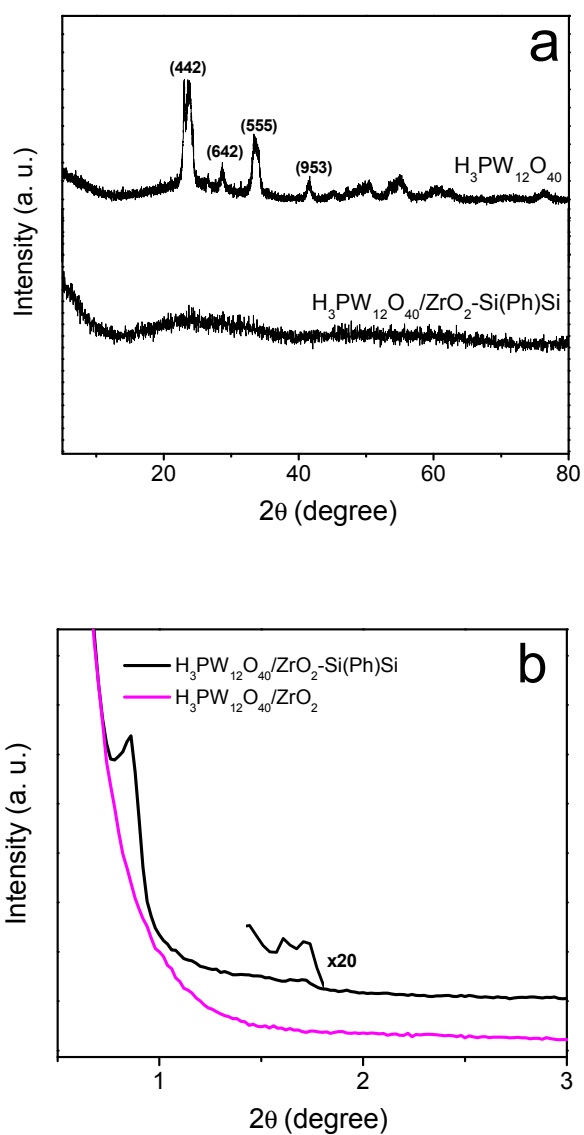

**Fig. S2** Nitrogen gas adsorption-desorption isotherms and pore size distribution

(insert) profile of  $\text{H}_3\text{PW}_{12}\text{O}_{40}/\text{ZrO}_2$ .

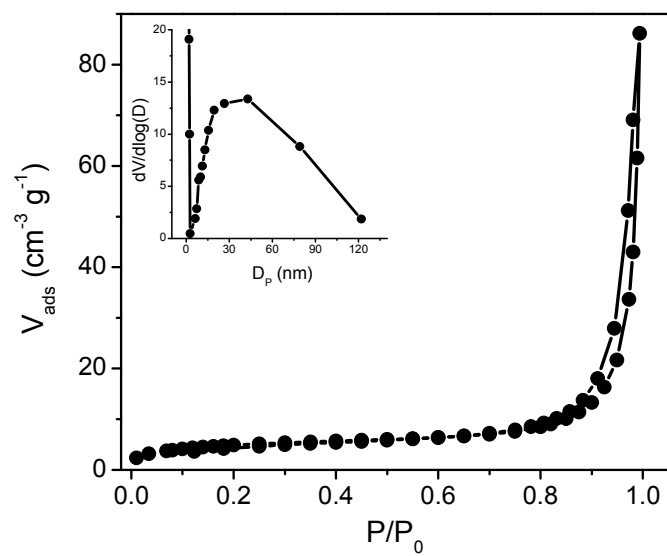

**Fig. S3** Influence of the catalyst amount on the yield of methyl levulinate. LA: MeOH

= 1 : 7; 3 h; 65 °C; atmosphere refluxing.

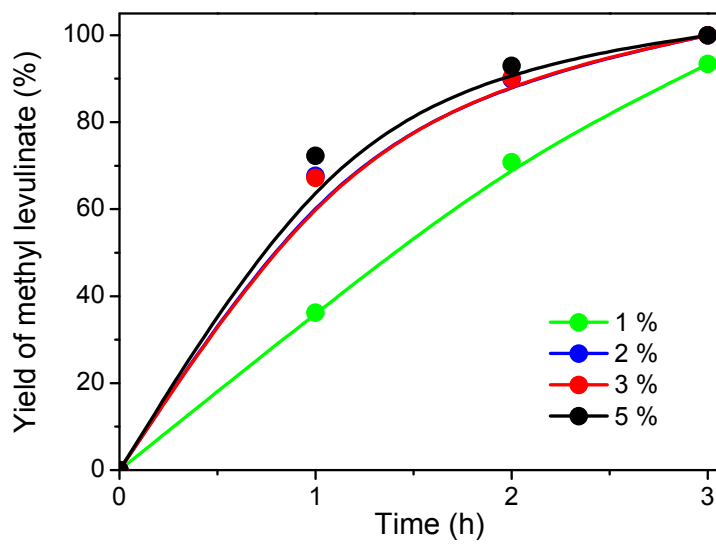

**Fig. S4** Influence of the stirring speed on the yield of methyl levulinate. LA: MeOH = 1: 7;  $\text{H}_3\text{PW}_{12}\text{O}_{40}/\text{ZrO}_2\text{-Si(Ph)Si}$  (2 wt%); 3 h; 65 °C; atmosphere refluxing.

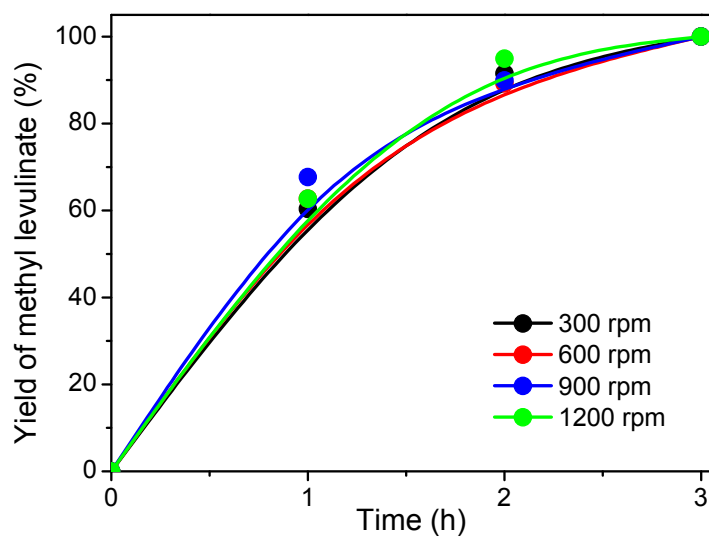

Supplement: c3gc36912a.pdf [file c3gc36912a.pdf]
